# Supplementary material for: Transition metal embedded C3N monolayers as promising catalysts for the hydrogen evolution reaction
Source: Royal Society of Chemistry journal article supplement (doi:10.1039/c9cp04267a), 2019-01-01
Supplement: c9cp04267a1.pdf [file c9cp04267a1.pdf]

**Transition metal embedded C<sub>3</sub>N monolayers as promising catalysts for the  
hydrogen evolution reaction**

Yameng Zhao<sup>1,2</sup>, Dongwei Ma<sup>2,\*</sup>, Jing Zhang<sup>2</sup>, Zhansheng Lu<sup>3</sup>,  
and Yuanxu Wang<sup>1,\*</sup>

*<sup>1</sup>Institute for Computational Materials Science, School of Physics and Electronics,  
Henan University, Kaifeng 475004, China*

*<sup>2</sup>School of Physics, Anyang Normal University, Anyang 455000, China*

*<sup>3</sup>College of Physics and Materials Science, Henan Normal University, Xinxiang  
453007, China*

**Supporting Information**

---

\*Corresponding author. E-mail: [dwmachina@126.com](mailto:dwmachina@126.com) (Dongwei Ma).

\*Corresponding author. E-mail: [wangyx@henu.edu.cn](mailto:wangyx@henu.edu.cn) (Yuanxu Wang).

**Table S1.** Zero-point energy ( $E_{ZPE}$  in eV) and entropy multiplied by T (T = 298.15 K and TS in eV) for the H atom adsorbed on the M and M-C1 sites for the M-CC catalysts. Note that the value of  $E_{ZPE}$  is 0.31 eV for the H atom adsorbed on the C atom of the pristine  $C_3N$  monolayer.

| Sites | $E_{ZPE}$ | TS   | Sites | $E_{ZPE}$ | TS   |
|-------|-----------|------|-------|-----------|------|
| Ti    | 0.15      | 0.03 | Ti-C1 | 0.28      | 0.00 |
| V     | 0.16      | 0.02 | V-C1  | 0.26      | 0.00 |
| Cr    | 0.15      | 0.03 | Cr-C1 | 0.29      | 0.00 |
| Mn    | 0.18      | 0.02 | Mn-C1 | 0.30      | 0.00 |
| Fe    | 0.19      | 0.01 | Fe-C1 | 0.29      | 0.00 |
| Co    | 0.19      | 0.02 | Co-C1 | 0.29      | 0.00 |
| Ni    | 0.16      | 0.03 | Ni-C1 | 0.30      | 0.00 |
| Cu    | 0.13      | 0.03 | Cu-C1 | 0.30      | 0.00 |
| Zn    | 0.16      | 0.02 | Zn-C1 | 0.30      | 0.00 |
| Mo    | 0.17      | 0.02 | Mo-C1 | ---       | ---  |
| Ru    | 0.18      | 0.02 | Ru-C1 | 0.39      | 0.00 |
| Rh    | 0.19      | 0.02 | Rh-C1 | 0.30      | 0.00 |
| Pd    | 0.17      | 0.03 | Pd-C1 | 0.30      | 0.00 |
| Ag    | 0.11      | 0.04 | Ag-C1 | 0.30      | 0.00 |
| Os    | 0.19      | 0.02 | Os-C1 | 0.36      | 0.00 |
| Ir    | 0.20      | 0.02 | Ir-C1 | 0.30      | 0.00 |
| Pt    | 0.18      | 0.03 | Pt-C1 | 0.30      | 0.00 |
| Au    | 0.13      | 0.03 | Au-C1 | 0.31      | 0.00 |

**Table S2.** The formation energy ( $E_f$  in eV) for the various TM@C<sub>3</sub>N systems and the binding energy ( $E_b$  in eV) for the M-CC systems.

|      | $E_f$ |      | $E_f$ |       | $E_f$ |       | $E_f (E_b)$  |
|------|-------|------|-------|-------|-------|-------|--------------|
| Ti-C | 2.81  | Ti-N | 4.04  | Ti-CN | 3.08  | Ti-CC | 1.00 (-3.39) |
| V-C  | 3.56  | V-N  | 4.74  | V-CN  | 3.81  | V-CC  | 1.54 (-3.30) |
| Cr-C | 3.58  | Cr-N | 4.00  | Cr-CN | 3.69  | Cr-CC | 1.28 (-3.55) |
| Mn-C | 3.73  | Mn-N | 3.96  | Mn-CN | 2.78  | Mn-CC | 0.71 (-4.13) |
| Fe-C | 3.64  | Fe-N | 3.78  | Fe-CN | 3.06  | Fe-CC | 1.10 (-3.74) |
| Co-C | 3.89  | Co-N | 3.52  | Co-CN | 2.59  | Co-CC | 0.73 (-4.10) |
| Ni-C | 4.08  | Ni-N | 4.43  | Ni-CN | 1.88  | Ni-CC | 0.49 (-4.34) |
| Cu-C | 4.64  | Cu-N | 5.54  | Cu-CN | 2.81  | Cu-CC | 2.04 (-2.79) |
| Zn-C | 3.69  | Zn-N | 4.81  | Zn-CN | 4.08  | Zn-CC | 2.08 (-2.76) |
| Mo-C | 5.03  | Mo-N | 5.77  | Mo-CN | 4.81  | Mo-CC | 3.09 (-1.74) |
| Ru-C | 4.48  | Ru-N | 4.48  | Ru-CN | 4.40  | Ru-CC | 2.77 (-2.06) |
| Rh-C | 4.47  | Rh-N | 3.88  | Rh-CN | 3.51  | Rh-CC | 1.60 (-3.24) |
| Pd-C | 4.94  | Pd-N | 5.32  | Pd-CN | 2.86  | Pd-CC | 1.38 (-3.49) |
| Ag-C | 5.65  | Ag-N | 6.61  | Ag-CN | 4.22  | Ag-CC | 3.28 (-1.55) |
| Os-C | 5.51  | Os-N | 5.50  | Os-CN | 4.57  | Os-CC | 3.15 (-1.69) |
| Ir-C | 5.35  | Ir-N | 4.73  | Ir-CN | 3.46  | Ir-CC | 1.79 (-3.05) |
| Pt-C | 5.20  | Pt-N | 5.54  | Pt-CN | 2.08  | Pt-CC | 0.90 (-3.93) |
| Au-C | 5.82  | Au-N | 6.80  | Au-CN | 2.97  | Au-CC | 2.38 (-2.45) |

**Table S3.** Net Bader charge ( $Q$  in  $e$ ) of the doped TM atom and the C atom bonded to it for the M-CC systems. The positive charge value means the atom loses electrons.

|    | $Q$  |       | $Q$  |    | $Q$  |       | $Q$  |
|----|------|-------|------|----|------|-------|------|
| Ti | 1.45 | Ti-C1 | 0.14 | Mo | 1.21 | Mo-C1 | 0.23 |
| V  | 1.31 | V-C1  | 0.19 | Ru | 0.74 | Ru-C1 | 0.27 |
| Cr | 1.22 | Cr-C1 | 0.21 | Rh | 0.54 | Rh-C1 | 0.32 |
| Mn | 1.24 | Mn-C1 | 0.21 | Pd | 0.55 | Pd-C1 | 0.37 |
| Fe | 1.00 | Fe-C1 | 0.22 | Ag | 0.75 | Ag-C1 | 0.32 |
| Co | 0.75 | Co-C1 | 0.28 | Os | 0.83 | Os-C1 | 0.22 |
| Ni | 0.71 | Ni-C1 | 0.32 | Ir | 0.63 | Ir-C1 | 0.30 |
| Cu | 0.84 | Cu-C1 | 0.29 | Pt | 0.56 | Pt-C1 | 0.37 |
| Zn | 1.05 | Zn-C1 | 0.28 | Au | 0.69 | Au-C1 | 0.32 |

**Table S4.** Spin moment ( $M$  in  $\mu_B$ ) of the M-CC systems.

|       | $M$  |       | $M$  |
|-------|------|-------|------|
| Ti-CC | 0.66 | Mo-CC | 0.93 |
| V-CC  | 1.99 | Ru-CC | 0.00 |
| Cr-CC | 3.20 | Rh-CC | 0.00 |
| Mn-CC | 3.78 | Pd-CC | 0.00 |
| Fe-CC | 2.39 | Ag-CC | 0.00 |
| Co-CC | 0.80 | Os-CC | 0.00 |
| Ni-CC | 0.00 | Ir-CC | 0.00 |
| Cu-CC | 0.00 | Pt-CC | 0.00 |
| Zn-CC | 0.00 | Au-CC | 0.00 |

**Table S5.**  $\Delta G_H$  (in eV) for the H atom on the M-C2, M-C3, M-C4, and M-C5 sites.

| Sites | $\Delta G_H$ | Sites | $\Delta G_H$ | Sites | $\Delta G_H$ |
|-------|--------------|-------|--------------|-------|--------------|
| Ti-C2 | 0.63         | Ni-C2 | 0.52         | Pd-C2 | 0.48         |
| Ti-C3 | 1.35         | Ni-C3 | 1.19         | Pd-C3 | 1.14         |
| Ti-C4 | 1.01         | Ni-C4 | 1.09         | Pd-C4 | 1.00         |
| Ti-C5 | 1.14         | Ni-C5 | 1.25         | Pd-C5 | 1.26         |
| V-C2  | 0.65         | Cu-C2 | 0.71         | Ag-C2 | 0.78         |
| V-C3  | 1.23         | Cu-C3 | 1.07         | Ag-C3 | 1.13         |
| V-C4  | 0.97         | Cu-C4 | 1.07         | Ag-C4 | 1.07         |
| V-C5  | 1.27         | Cu-C5 | 1.00         | Ag-C5 | 1.08         |
| Cr-C2 | 0.47         | Zn-C2 | 0.50         | Os-C2 | 0.20         |
| Cr-C3 | 1.05         | Zn-C3 | 0.87         | Os-C3 | 0.94         |
| Cr-C4 | 0.98         | Zn-C4 | 0.92         | Os-C4 | 0.79         |
| Cr-C5 | 1.12         | Zn-C5 | 1.06         | Os-C5 | 1.21         |
| Mn-C2 | 0.41         | Mo-C2 | 0.58         | Ir-C2 | 0.19         |
| Mn-C3 | 1.15         | Mo-C3 | 1.29         | Ir-C3 | 1.00         |
| Mn-C4 | 1.06         | Mo-C4 | 0.87         | Ir-C4 | 0.86         |
| Mn-C5 | 1.16         | Mo-C5 | 1.22         | Ir-C5 | 1.20         |
| Fe-C2 | 0.35         | Ru-C2 | 0.29         | Pt-C2 | 0.40         |
| Fe-C3 | 1.15         | Ru-C3 | 1.00         | Pt-C3 | 1.17         |
| Fe-C4 | 1.02         | Ru-C4 | 0.80         | Pt-C4 | 1.02         |
| Fe-C5 | 1.18         | Ru-C5 | 1.28         | Pt-C5 | 1.23         |
| Co-C2 | 0.35         | Rh-C2 | 0.26         | Au-C2 | 0.71         |
| Co-C3 | 1.10         | Rh-C3 | 1.00         | Au-C3 | 1.16         |
| Co-C4 | 0.98         | Rh-C4 | 0.85         | Au-C4 | 1.08         |
| Co-C5 | 1.23         | Rh-C5 | 1.24         | Au-C5 | 1.09         |

**Table S6.**  $\Delta G_H$  (in eV) for the second H atom adsorbed on the M-CC catalysts.

| Sites | $\Delta G_H$ | Sites | $\Delta G_H$ | Sites | $\Delta G_H$ |
|-------|--------------|-------|--------------|-------|--------------|
| Ti-C1 | 0.17         | Ni-C1 | 0.17         | Pd-C2 | 0.24         |
| V-C1  | 0.22         | Cu-C2 | 0.13         | Ag-C2 | -0.01        |
| Cr-C2 | 0.20         | Zn    | 0.18         | Os-C1 | -0.08        |
| Mn-C2 | 0.14         | Mo-C1 | 0.56         | Ir-C1 | 0.35         |
| Fe-C1 | 0.37         | Ru-C1 | 0.14         | Pt-C2 | 0.19         |
| Co-C1 | 0.39         | Rh-C1 | 0.26         | Au-C2 | 0.00         |

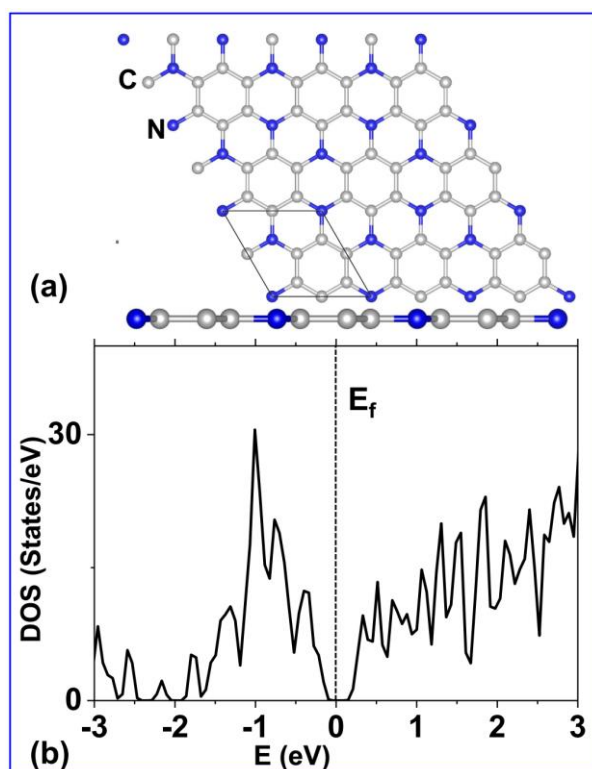

**Fig. S1.** (a) Top and side views of the (3×3) supercell of the pristine  $C_3N$  monolayer, of which the primitive cell is enclosed by the solid lines. (b) The TDOS of the  $C_3N$  monolayer shown in (a). The Fermi level ( $E_f$ ) is set to 0 eV and indicated by the vertical dashed line.

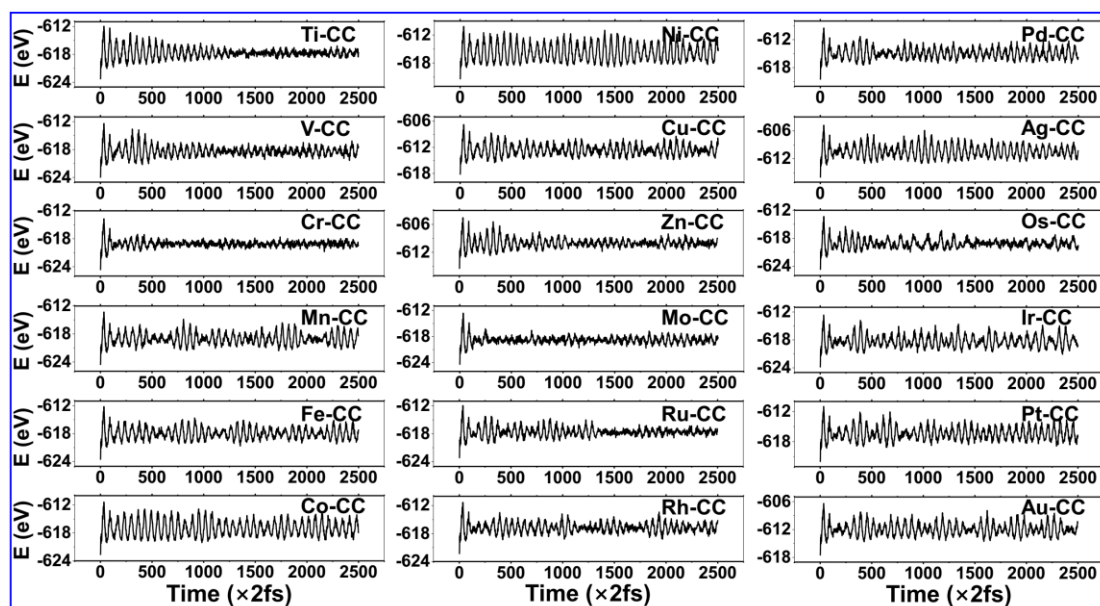

**Fig. S2.** Variation of the energy against the time for the AIMD simulation of the M-CC catalysts. The simulation has been run under 600 K for 5 ps with a time step of 2 fs.

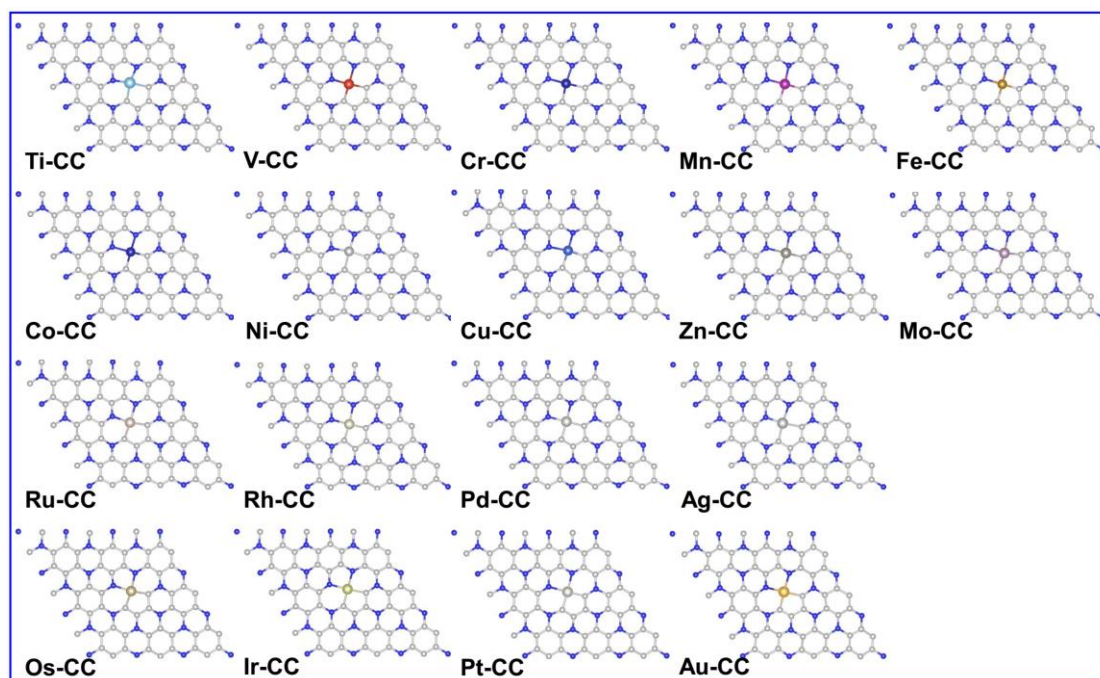

**Fig. S3.** The final structures of the M-CC catalysts after the AIMD simulation.

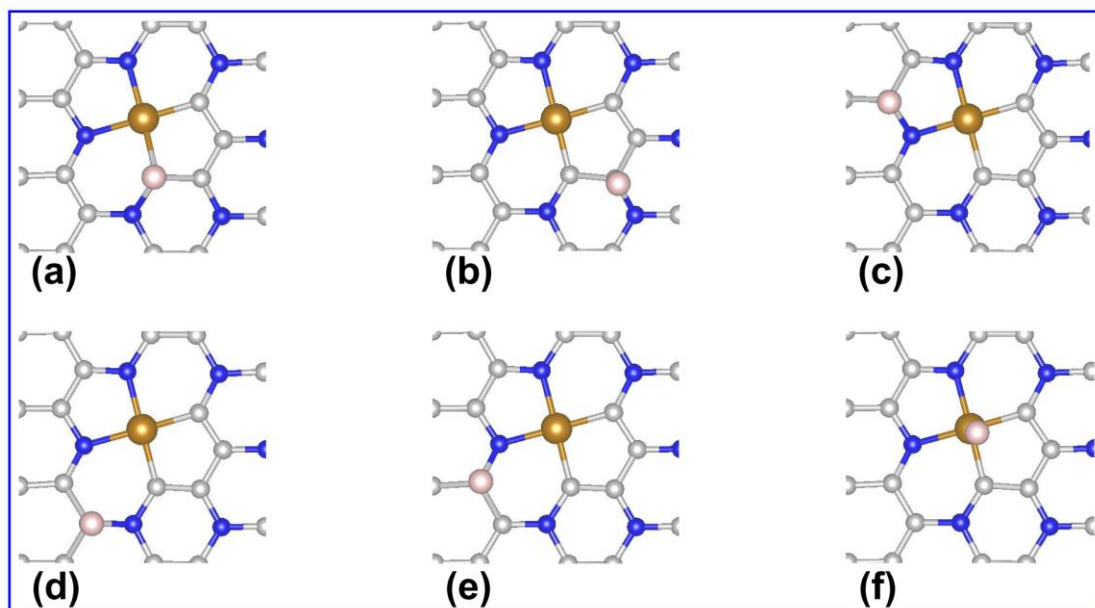

**Fig. S4.** Top views of the typical H adsorption configurations for the various sites of the M-CC catalyst, including M-C1 (a), M-C2 (b), M-C3 (c), M-C4 (d), M-C5 (e), and M (f).

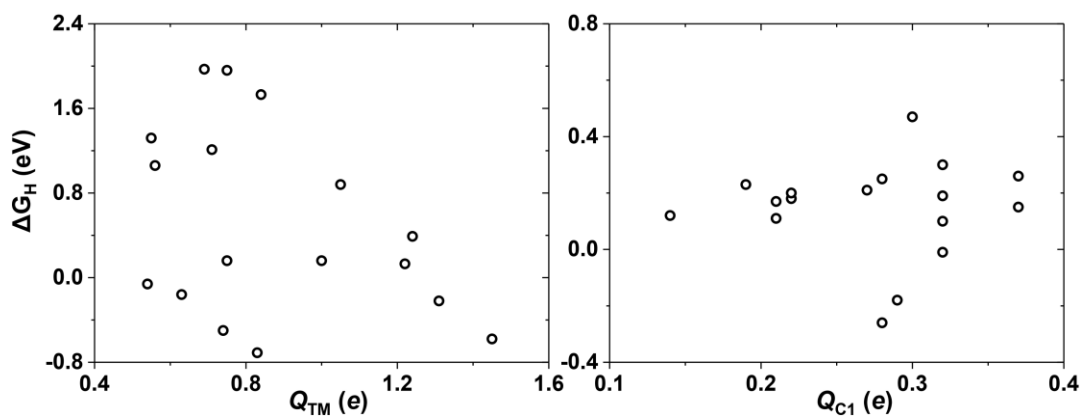

**Fig. S5.** Relationships between the calculated  $\Delta G_H$  and the net charges on the embedded TM atoms (left panel) and the M-C1 atoms (right panel).  $Q_{TM}$  and  $Q_{C1}$  are the net charges on the embedded TM atoms and the M-C1 atoms, respectively.



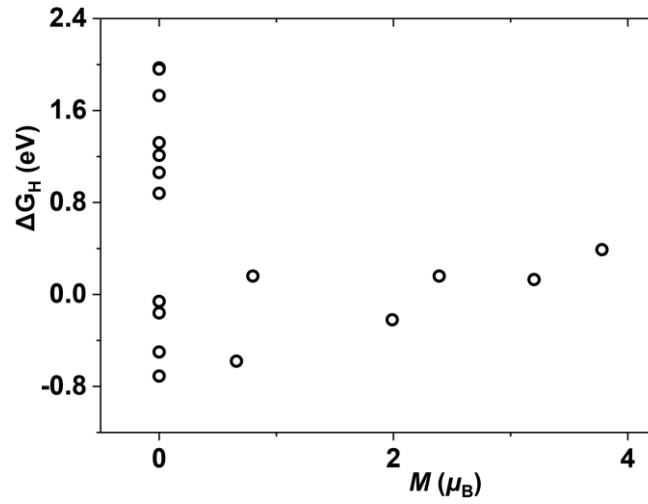

**Fig. S6.** Relationships between the calculated  $\Delta G_H$  for the embedded TM atom sites and the spin magnetic moments.

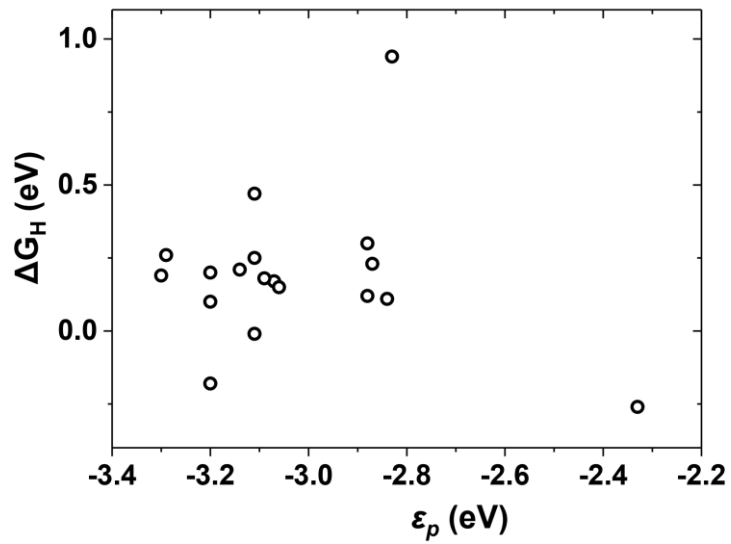

**Fig. S7.** Relationship between  $\Delta G_H$  and  $\epsilon_p$  for the C atom of the pristine  $C_3N$  monolayer and the M-C1 atoms. The integral domains is  $[-5 \text{ eV}, 0 \text{ eV}]$ .

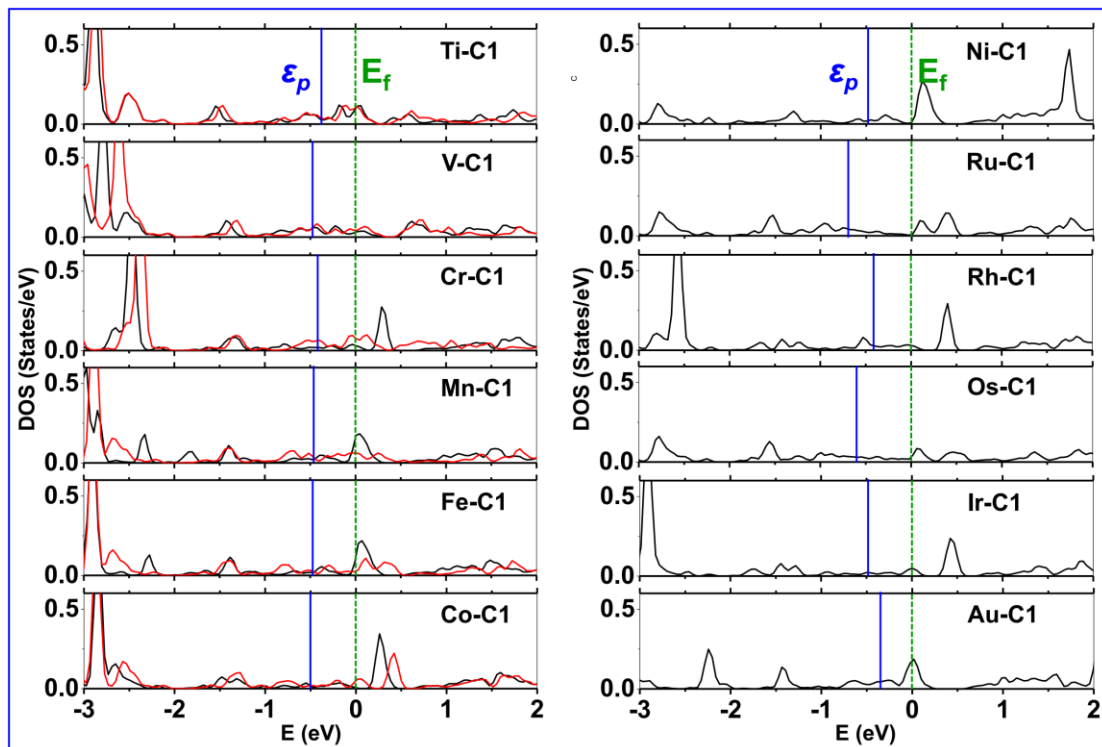

**Fig. S8.** The LDOS projected on the  $2p$  orbitals of the M-C1 atoms for Ti, V, Cr, Mn, Fe, Co, Ni, Ru, Rh, Os, Ir, and Au-CC systems. The vertical blue line indicates the position of the  $p$ -band center ( $\epsilon_p$ ). In the left panel, the C atom has net spin magnetic moment, and the black and red curves denote the spin-up and spin-down states, respectively. For the nonmagnetic systems, only the spin-up part of the LDOS can be seen. The Fermi level ( $E_f$ ) is set to 0 eV and indicated by the green dashed line.

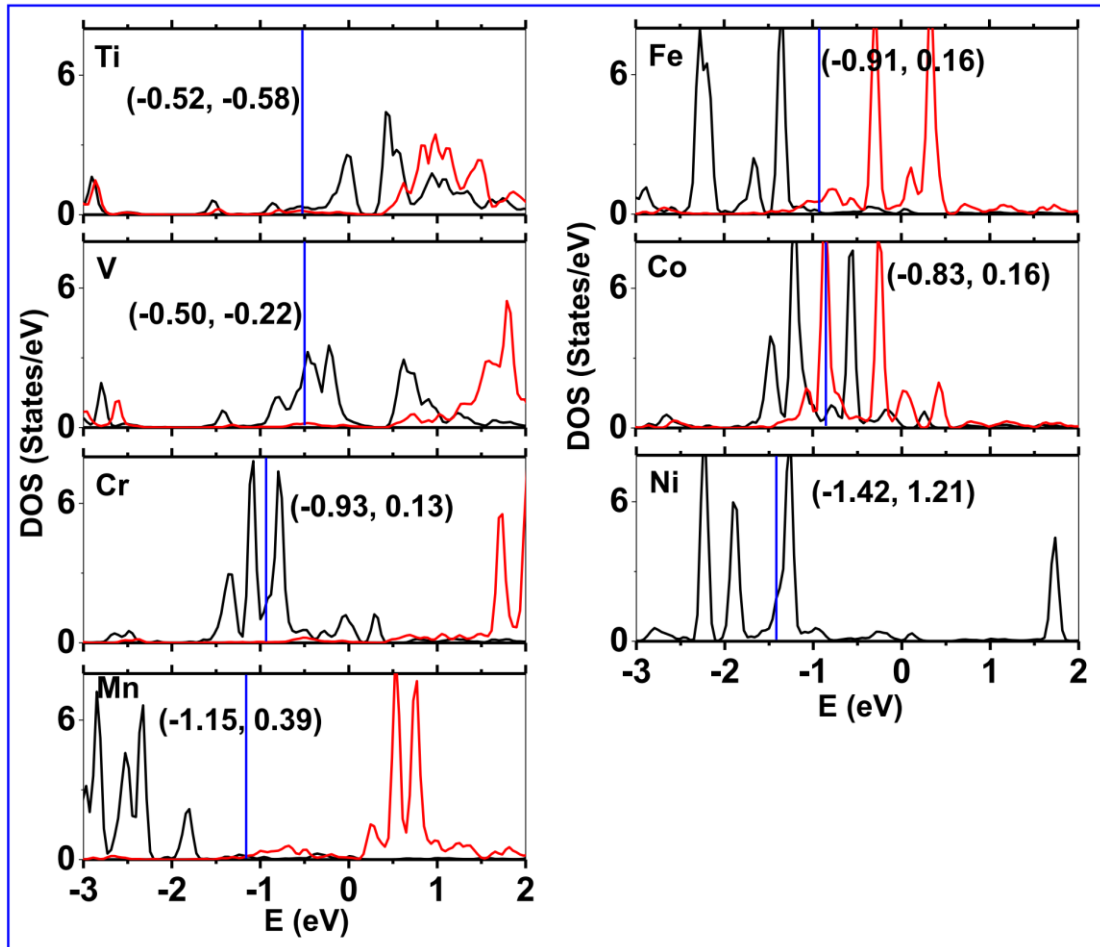

**Fig. S9.** The LDOS projected on the 3d orbitals of the doped TM atoms for Ti, V, Cr, Mn, Fe, Co, and Ni-CC. The vertical blue line indicates the position of the  $d$ -band center ( $\epsilon_d$ ). For the spin-polarized systems, and the black and red curves denote the spin-up and spin-down states, respectively. For the nonmagnetic systems, only the spin-up part of the LDOS can be seen. The Fermi level is set to 0 eV. The values of the calculated  $\epsilon_d$  (former) and the relevant  $\Delta G_H$  (latter) are given in the parenthesis.

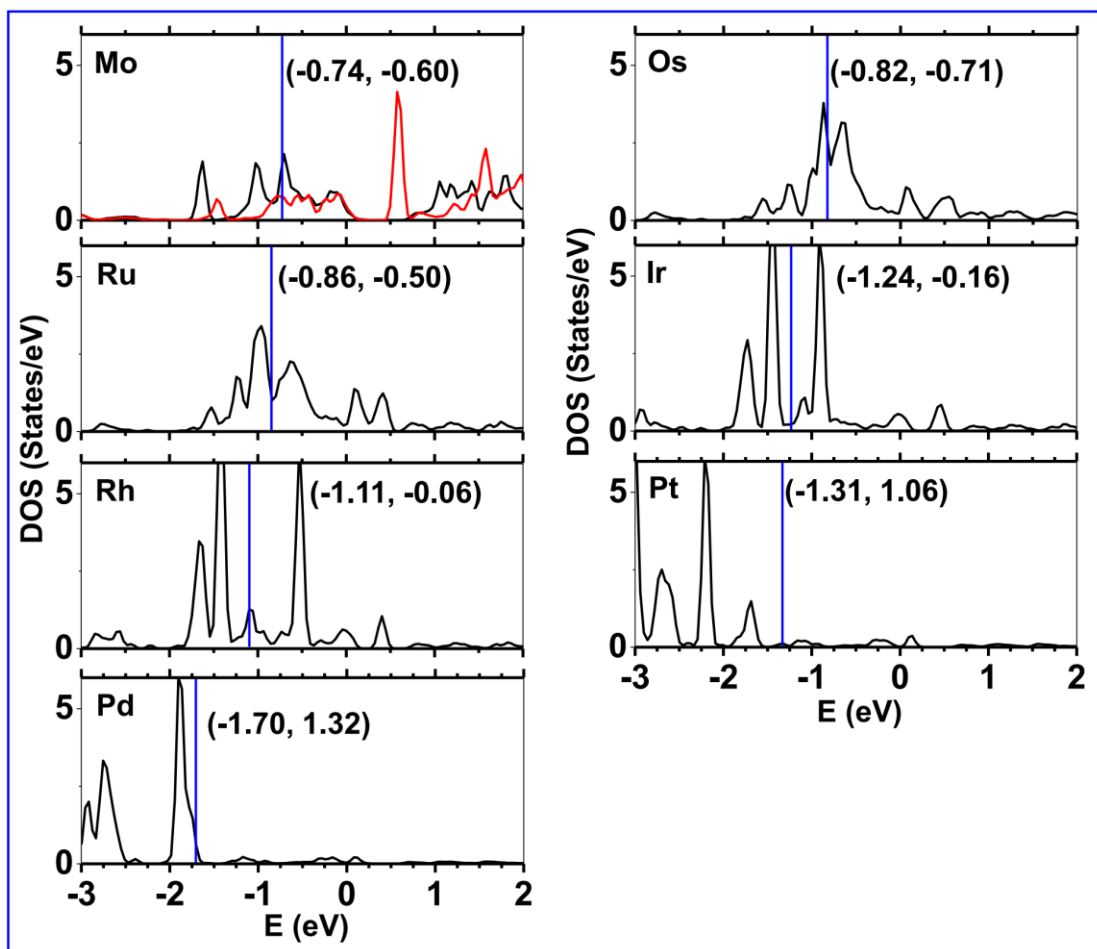

Fig. S10. Similar to Fig. S9, except that it is for the Mo, Ru, Rh, Pd, Os, Ir, and Pt-CC.

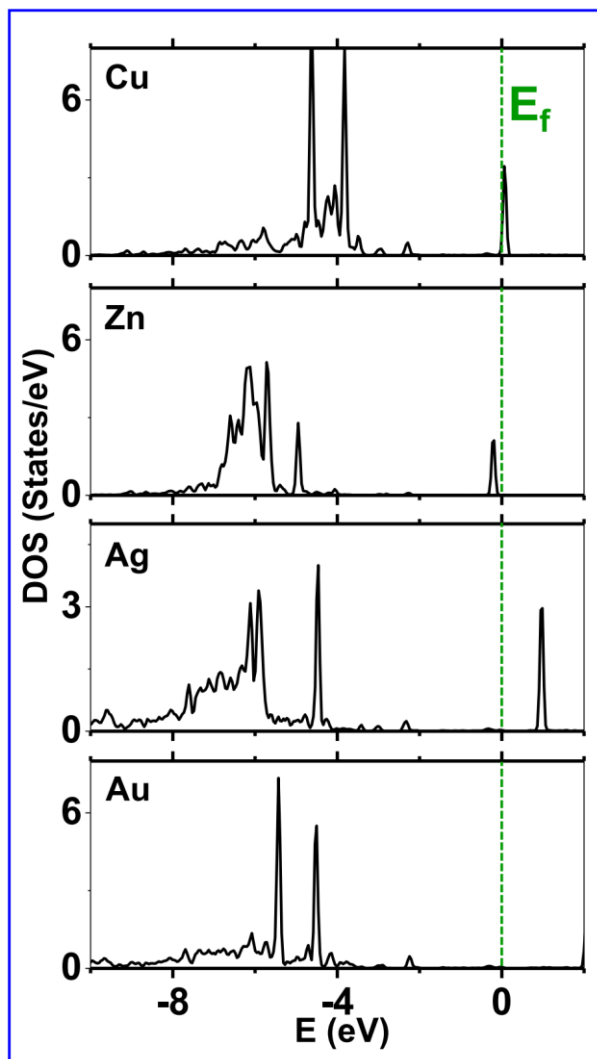

**Fig. S11.** The LDOS projected on the  $d$  orbitals of the doped TM atoms for Cu, Zn, Ag, and Au-CC systems. The Fermi level is set to 0 eV and indicated by the green dashed line. Due to that these systems are nonmagnetic, the spin-up part of the LDOS is overlapped with the spin-down part.

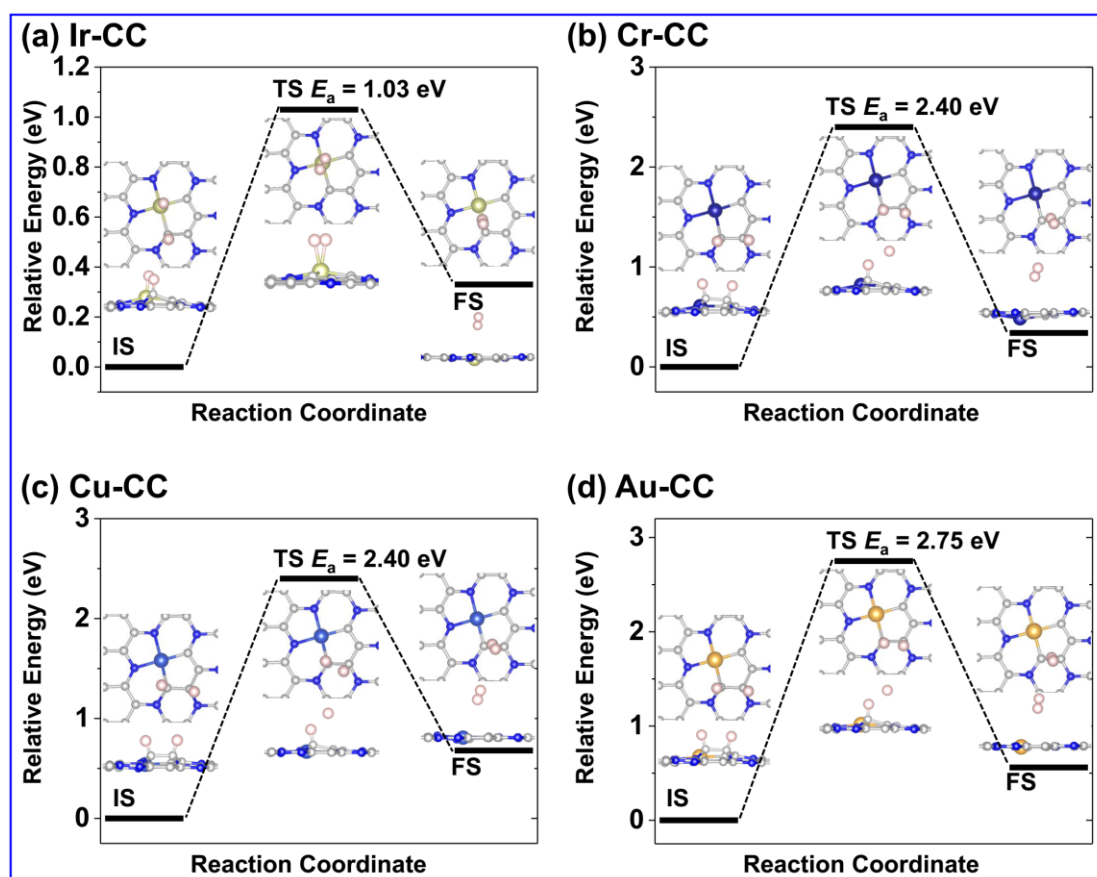

**Fig. S12.** Minimum-energy pathways of the HER under the Tafel mechanism for the Ir-CC (a), Cr-CC (b), Cu-CC (c), and Au-CC (d) catalysts. The insets are the corresponding atomic structures of the IS, TS, and FS. The kinetic barriers ( $E_a$  in eV) are given.
